# Supplementary material for: Screening and identification of an anti-PD-1 nanobody with antitumor activity
Source: Oxford University Press journal article supplement (doi:10.1042/bsr20221546), 2022-12-07
Supplement: bsr-2022-1546_supp.pdf [file bsr-2022-1546_supp.pdf]

| Name        | Sequence(5' to 3')                         |
|-------------|--------------------------------------------|
| CALL001     | GTCCTGGCTGCTCTTCTACAAAG                    |
| CALL002     | GGTACGTGCTGT TGAAGTGTTC                    |
| VHH-Forward | TCGCGGCCAGCCGGCCAGGTCCAAGTGCAGGAGTCTGGGG   |
| VHH-Reverse | ATAAGAATGCGGCCGCTGAGGAGACGGTGAC CTGGGTCCCC |

**Supplementary Table 1 Sequences and applications of primers used in this study.**

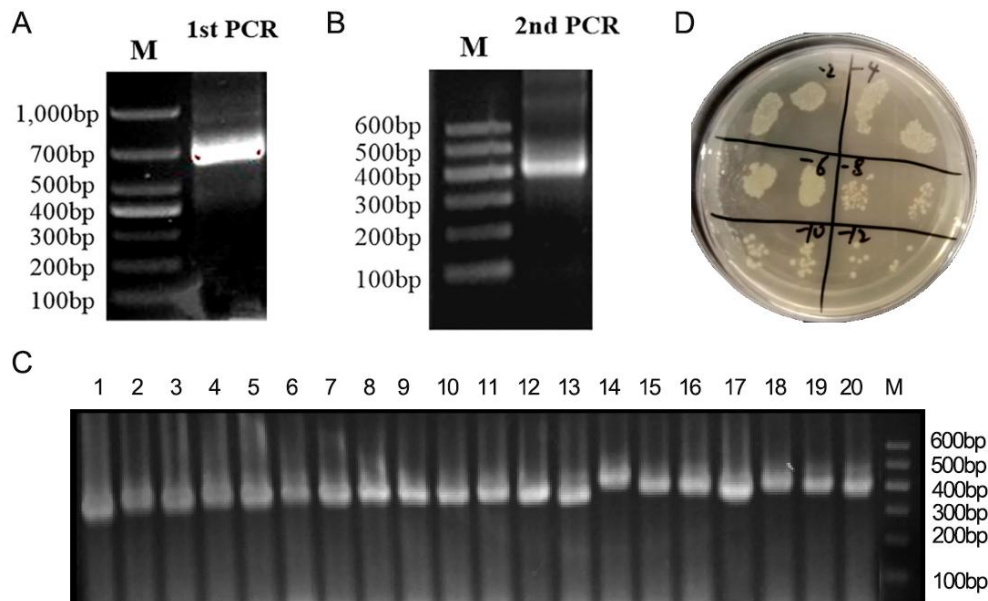

**Supplementary Fig.1 Generation of the naïve phage display library.**

(A-B) VHH genes were obtained by Nested PCR. (C) 20 colonies were randomly picked to estimate the correct insertion rate of VHH genes by PCR amplification. (D) The library size was measured by counting colonies number after serial dilution.
